# Supplementary material
Source: publisher figshare collection journal article supplement (https://acs.figshare.com/ndownloader/files/4117321)
Supplement: Supplementary file 1 [file 4117321]

# Supporting Information

## Luminescence Properties of $\alpha$ -NaYF<sub>4</sub>:Nd<sup>3+</sup> Nanocrystals Dispersed in Liquid: Local Field Effect Investigation

*Xiaojie Xue, Zhongchao Duan, Takenobu Suzuki, Rajanish N. Tiwari, Masamichi*

*Yoshimura and Yasutake Ohishi\**

Graduate School of Engineering, Toyota Technological Institute, 2-12-1 Hisakata

Tempaku, Nagoya 468-8511, Japan

\* Corresponding author: [ohishi@toyota-ti.ac.jp](mailto:ohishi@toyota-ti.ac.jp)

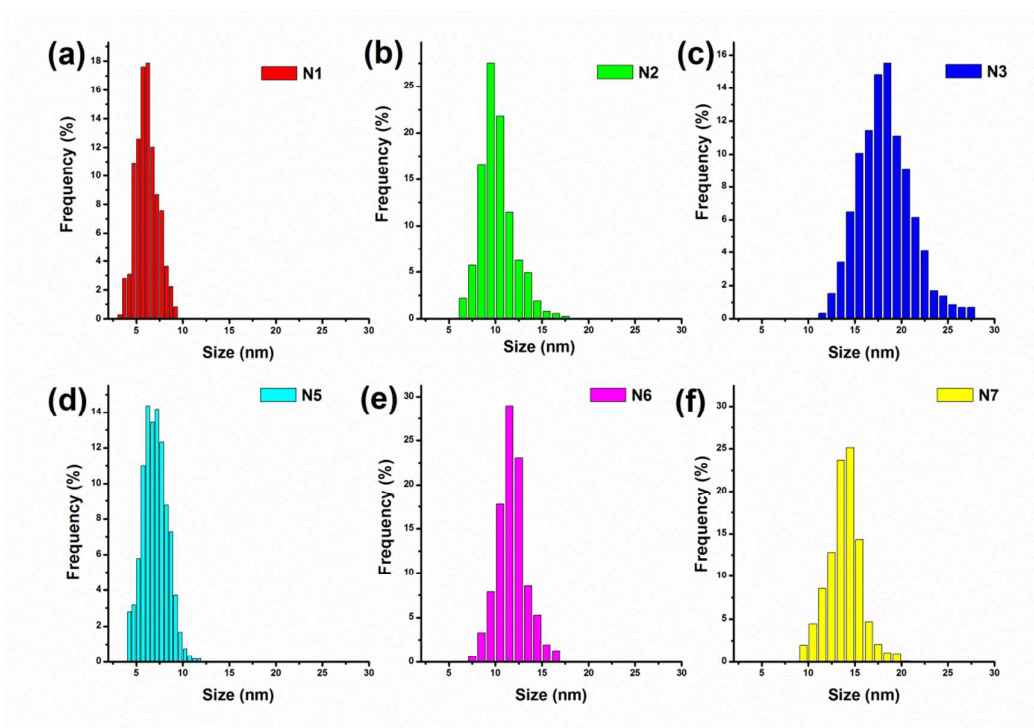

**Figure S1.** Histograms of the particle sizes for  $\alpha$ -NaYF<sub>4</sub>:1% Nd<sup>3+</sup> nanocrystals synthesized with the F<sup>-</sup>/Ln<sup>3+</sup> molar ratio of (a) 3:1, (b) 4:1, and (c) 5:1 with 0.2 g NaOH and (d) 3:1, (e) 4:1, and (f) 5:1 with 0.4 g NaOH. These data were obtained from the TEM images of more than 400 nanocrystals. By Gauss fitting the average size was obtained to be (a) 6.0±1.3 nm, (b) 10.6±1.6 nm, (c) 18.3±3.0 nm, (d) 7.0±1.6 nm, (e) 11.7±1.9 nm, and (f) 14.0±1.7 nm.

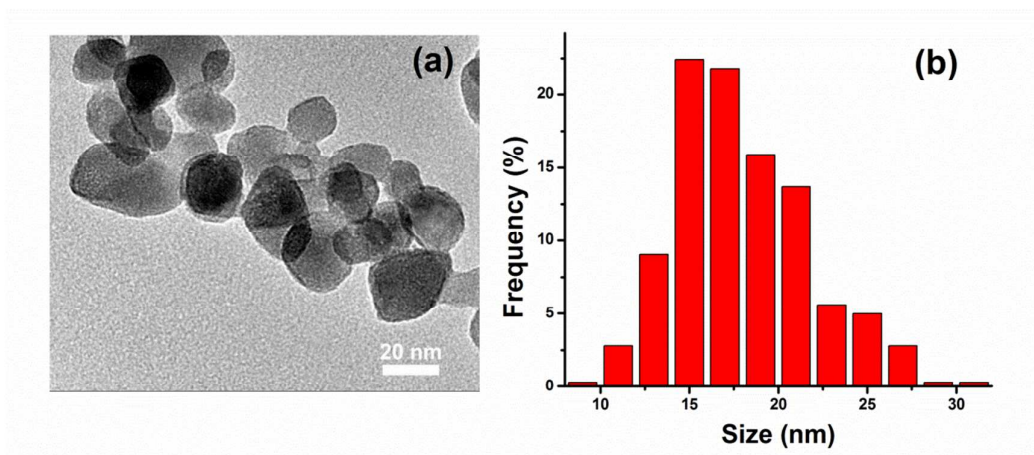

**Figure S2.** (a) The TEM image of  $\alpha$ -NaYF<sub>4</sub>:5% Nd<sup>3+</sup> nanocrystals (sample N10) and (b) the corresponding histograms of the particle sizes for counting more than 200 particles. By Gauss fitting the average size was calculated to be  $17.1 \pm 3.9$  nm.

**Table S1.** Detailed emission lifetimes and the corresponding weight factor<sup>a</sup> of  $\alpha$ -NaYF<sub>4</sub> nanocrystals with different size and Nd<sup>3+</sup> concentration.

| Sample                     | Size | WF <sub>1</sub> | $\tau_1$ ( $\mu$ s) | WF <sub>2</sub> | $\tau_2$ ( $\mu$ s) | WF <sub>3</sub> | $\tau_3$ ( $\mu$ s) |
|----------------------------|------|-----------------|---------------------|-----------------|---------------------|-----------------|---------------------|
| N3 (1% Nd <sup>3+</sup> )  | 18nm | 0.294           | 1106                | 0.597           | 409.48              | 0.109           | 106.51              |
| N10 (5% Nd <sup>3+</sup> ) | 18nm | 0.178           | 530.3               | 0.516           | 200.8               | 0.306           | 60                  |
| N7 (1% Nd <sup>3+</sup> )  | 14nm | 0.166           | 927                 | 0.628           | 373                 | 0.206           | 126                 |
| N2 (1% Nd <sup>3+</sup> )  | 10nm | 0.188           | 728                 | 0.627           | 285                 | 0.185           | 92                  |
| N1 (1% Nd <sup>3+</sup> )  | 6nm  | 0.170           | 513                 | 0.602           | 212                 | 0.228           | 64                  |

<sup>a</sup> the weight factor ( $WF_i$ ) illustrating the contribution of each lifetime is given by

$WF_i = A_i / \sum A_i$ , where  $A_i$  is the coefficient of each decay term in Eq. (4).

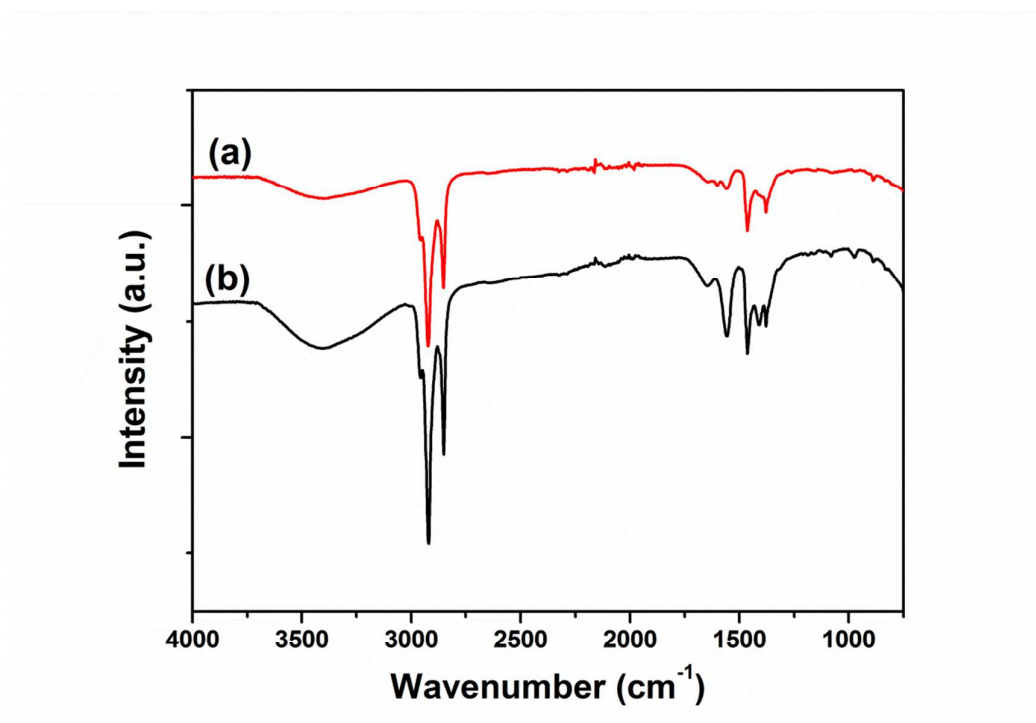

**Figure S3.** The FTIR spectra of  $\alpha$ -NaYF<sub>4</sub>:1%Nd<sup>3+</sup> nanocrystals with the average size of 14 nm which has been dispersed in toluene and kept for (a) more than 6 months (the initial kept sample colloidal) and (b) one month (recently made sample for demonstration).
